# Supplementary material for: Thyroid autoimmunity in euthyroid pregnant women is associated with slower productive language acquisition: the Odense child cohort study
Source: PubMed Central journal article supplement — Eur Thyroid J. 2024 May 31;13(3):e230233. doi: 10.1530/ETJ-23-0233 (PMC11227095; doi:10.1530/etj-23-0233), 2024-05-31
Supplement: supplementary_material.pdf [file supplementary_material.pdf]

**Supplementary to the article “Thyroid autoimmunity in euthyroid pregnant women is associated with slower productive language acquisition. The Odense Child Cohort Study”.**

**Figure 1S.** Directed acyclic graph (DAG) of the covariates of interest when investigating the association between maternal thyroid status during pregnancy and offspring language acquisition.

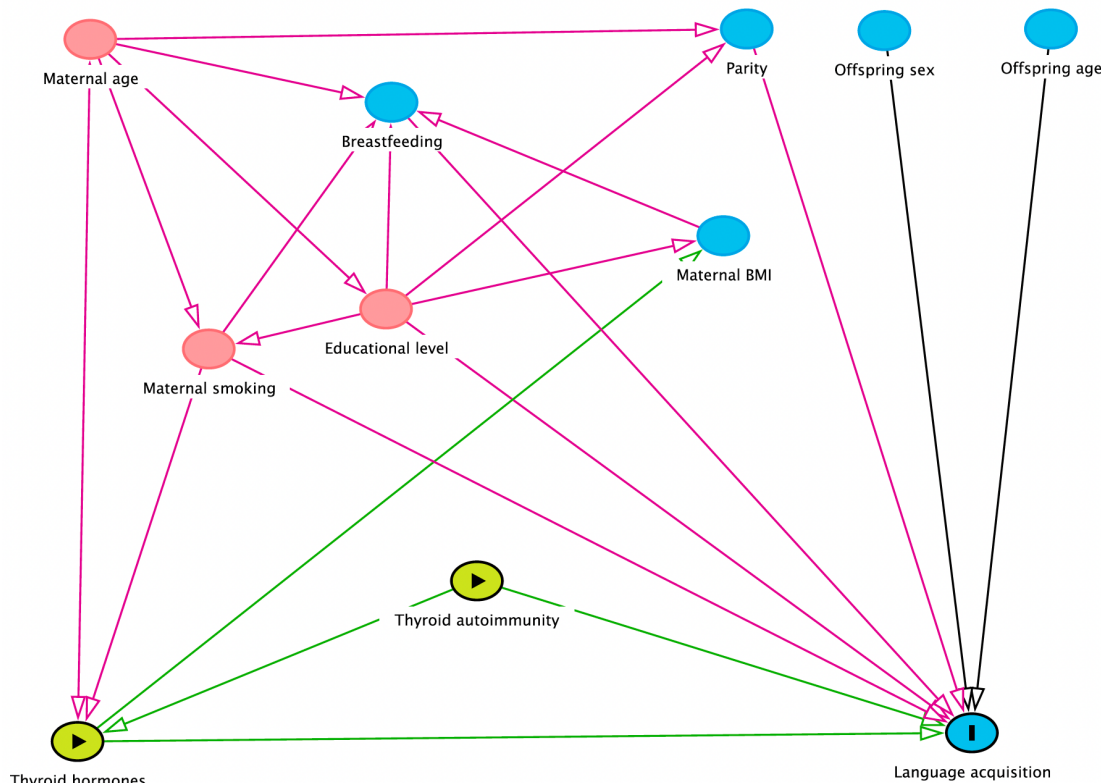

Covariates (blue and red circles) are intermediate factors. The red circles affect both exposure and outcome, and the blue circles potentially affect the outcome. The exposures (green circle with an arrow) are thyroid autoimmunity and thyroid hormones, and the outcome is language acquisition (blue circle with an I). The red lines are biasing paths. The green lines are the causal paths.

**Figure S2.** The predicted probabilities of productive vocabulary according to maternal thyrotropin (TSH)  $\leq 3.5$  or  $>3.5$  mIU/L plotted by offspring age. The lines represent the predicted mean trajectories of girls and boys, respectively, with corresponding 95% confidence intervals. The dotted lines show at which age groups the effect was significant.

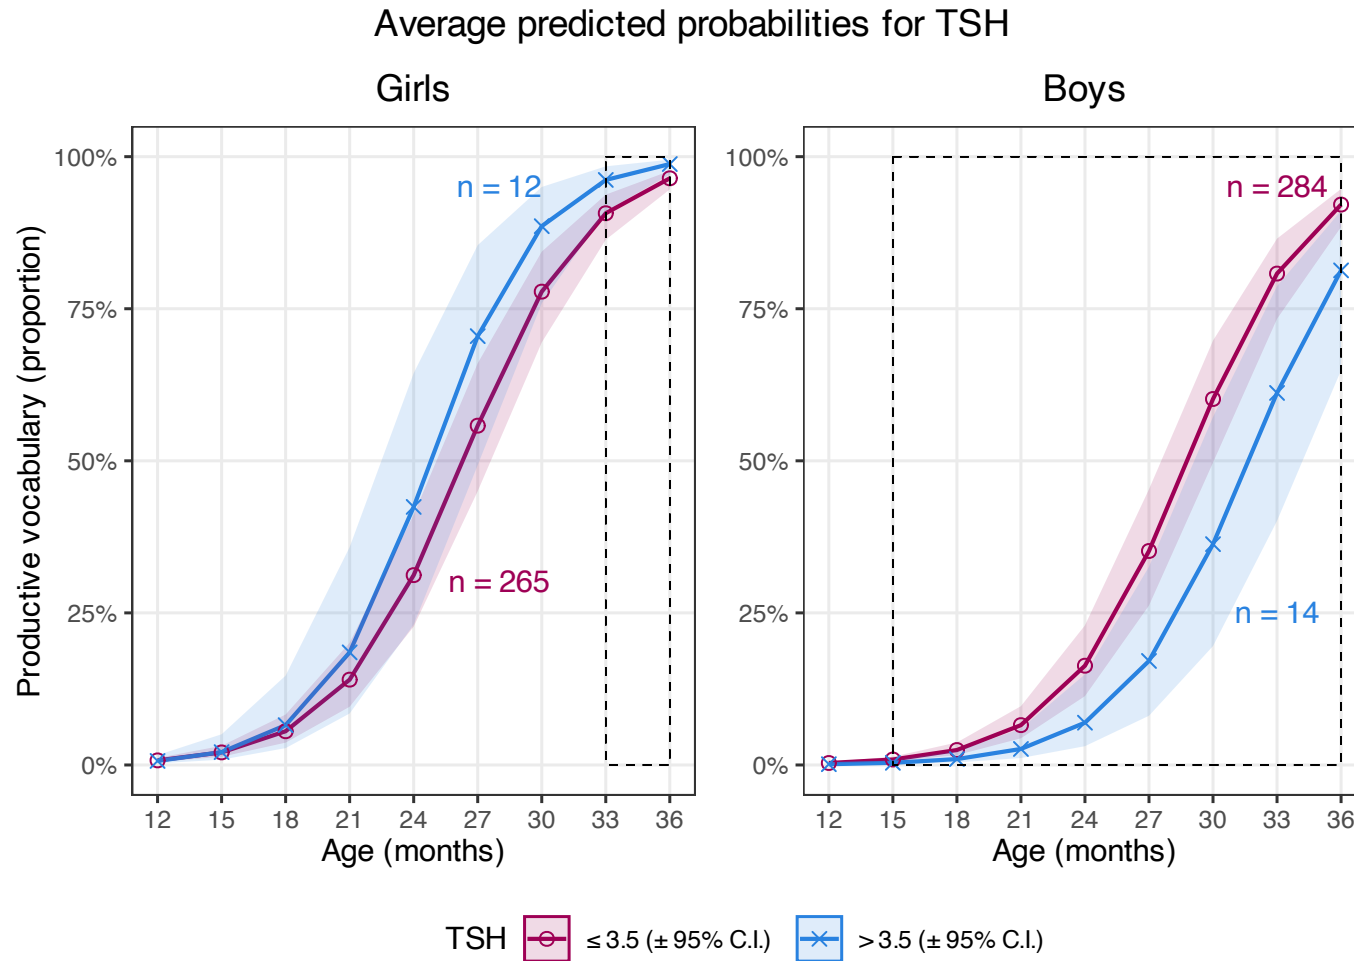

Note. TSH  $\leq 3.5$  mIU/L ( $\pm 95\%$  C.I.) vs.  $> 3.5$  mIU/L ( $\pm 95\%$  C.I.)

**Table S1.** Association between early pregnancy maternal thyrotropin (TSH)  $\leq 3.5$  mIU/L vs.  $>3.5$  mIU/L and productive vocabulary in the offspring aged 12-36 months.

|                 |        |
|-----------------|--------|
| Frequency table |        |
| $\leq 3.5$      | $>3.5$ |
| 95.1%           | 4.9%   |

|                                                                         | Girls (n=277) |      |               |                   | Boys (n=298) |      |              |                  |
|-------------------------------------------------------------------------|---------------|------|---------------|-------------------|--------------|------|--------------|------------------|
|                                                                         | OR            | SE   | 95% CI        | p-value           | OR           | SE   | 95% CI       | p-value          |
| <b>TSH (<math>\leq 3.5</math> mIU/L vs. <math>&gt;3.5</math> mIU/L)</b> |               |      |               |                   |              |      |              |                  |
| Intercept                                                               | 1.00          | 0.00 | (1.00, 1.00)  | <b>&lt;0.001</b>  | 1.00         | 0.00 | (1.00, 1.00) | <b>&lt;0.001</b> |
| Offspring age                                                           | 9.89          | 0.00 | (9.78, 10.01) | <b>&lt;0.001</b>  | 9.61         | 0.00 | (9.50, 9.72) | <b>&lt;0.001</b> |
| TSH ( $>3.5$ mIU/L)                                                     | 0.87          | 0.08 | (0.74, 1.02)  | 0.089             | 0.82         | 0.09 | (0.69, 0.98) | <b>0.030</b>     |
| Maternal age                                                            | 0.88          | 0.10 | (0.73, 1.07)  | 0.208             | 0.77         | 0.09 | (0.64, 0.92) | <b>0.005</b>     |
| Breastfeeding                                                           | 1.20          | 0.08 | (1.02, 1.41)  | <b>0.030</b>      | 1.21         | 0.08 | (1.03, 1.42) | <b>0.022</b>     |
| Maternal education (linear)                                             | 1.18          | 0.09 | (0.99, 1.41)  | 0.066             | 1.01         | 0.09 | (0.84, 1.21) | 0.905            |
| Maternal education (quadratic)                                          | 1.11          | 0.09 | (0.94, 1.32)  | 0.226             | 0.86         | 0.09 | (0.73, 1.02) | 0.079            |
| Primi- and multiparous                                                  | 0.77          | 0.10 | (0.63, 0.93)  | <b>0.007</b>      | 0.93         | 0.09 | (0.77, 1.11) | 0.422            |
| Pre-pregnancy BMI ( $<18.5$ )                                           | 0.87          | 0.10 | (0.71, 1.07)  | 0.190             | 1.09         | 0.09 | (0.91, 1.30) | 0.339            |
| Pre-pregnancy BMI ( $>25$ )                                             | 1.03          | 0.09 | (0.87, 1.22)  | 0.710             | 0.97         | 0.09 | (0.82, 1.15) | 0.703            |
| Offspring age $\times$ TSH ( $>3.5$ mIU/L)                              | 1.26          | 0.02 | (1.21, 1.31)  | <b>&lt; 0.001</b> | 0.99         | 0.02 | (0.95, 1.03) | 0.546            |

*Note.* The association between maternal TSH and the productive vocabulary are estimated by conditional growth models, including effects of time (offspring age) and main effects of covariates. The outputs of the conditional growth models are reported as odds ratios (OR), standard error (SE), and 95% confidence intervals (95% CI). *P*-values  $<0.05$  are significant and marked in bold.

Abbreviations: BMI, body mass index.

**Table S2.** Characteristics of included mother-child dyads compared to non-included mother-child dyads from the Odense child cohort. Data are presented as mean  $\pm$  standard deviation (SD), median (25<sup>th</sup>;75<sup>th</sup> percentile), and numbers, n (%). Differences between included and excluded participants were tested using t-test (parametric data) or Wilcoxon’s rank sum test (non-parametric data) for continuous variables and  $\chi^2$ -test for categorical variables.

| <b>Maternal characteristics</b>                                                    | <b>Included</b>          | <b>Excluded</b>          | <b>p-value</b> |
|------------------------------------------------------------------------------------|--------------------------|--------------------------|----------------|
| Maternal age                                                                       | (n=735)                  | (n=1843)                 |                |
| Years, mean $\pm$ SD                                                               | 30.3 $\pm$ 4.5           | 30.2 $\pm$ 4.5           | 0.74           |
| Pre-pregnancy body mass index                                                      | (n=735)                  | (n=1822)                 |                |
| kg/m <sup>2</sup> , median (25 <sup>th</sup> , 75 <sup>th</sup> percentile)        | 23.4 (21.3;26.5)         | 23.3 (21.2;26.3)         | 0.48           |
| Parity                                                                             | (n=735)                  | (n=2081)                 |                |
| Nulliparous, n (%)                                                                 | 436 (59.3)               | 977 (47.0)               | <b>0.00</b>    |
| Primi- and multiparous, n (%)                                                      | 299 (47.0)               | 1104 (53.0)              |                |
| Smoking                                                                            | (n=735)                  | (n=1812)                 |                |
| Yes, n (%)                                                                         | 25 (3.4)                 | 121 (6.7)                | <b>0.001</b>   |
| No, n (%)                                                                          | 710 (96.6)               | 1691 (93.3)              |                |
| Education                                                                          | (n=727)                  | (n=1998)                 |                |
| Low, n (%)                                                                         | 207 (28.5)               | 655 (32.8)               | 0.09           |
| Intermediate, n (%)                                                                | 373 (51.3)               | 950 (47.6)               |                |
| High, n (%)                                                                        | 147 (20.2)               | 393 (19.7)               |                |
| Ethnicity                                                                          | (n=725)                  | (n=1694)                 |                |
| European, n (%)                                                                    | 708 (96.3)               | 1592 (94.0)              | <b>0.00</b>    |
| Non-European, n (%)                                                                | 17 (2.3)                 | 102 (6.0)                |                |
| Thyroid status                                                                     | (n=735)                  | (n=319)                  |                |
| TPOAb $\geq$ 11.0 (kIU/L), median (25 <sup>th</sup> , 75 <sup>th</sup> percentile) | 52.6 (24.0;149.5) (n=88) | 75.2 (40.6;221.0) (n=51) | 0.72           |
| TPOAb<11.0 (kIU/L)                                                                 | n=647 (88.0)             | n=268 (14.5)             |                |
| FT4 (pmol/L), median (25 <sup>th</sup> , 75 <sup>th</sup> percentile)              | 13.9 (12.9;15.0)         | 13.7 (12.6;15.2)         | 0.21           |
| TSH (mIU/L), median (25 <sup>th</sup> , 75 <sup>th</sup> percentile)               | 1.43 (0.92;2.06)         | 1.36 (0.86;2.09)         | 0.73           |
| <b>Offspring characteristics</b>                                                   |                          |                          |                |
| Offspring sex                                                                      | (n=735)                  | (n=1818)                 |                |
| Girls, n (%)                                                                       | 352 (47.9)               | 846 (46.53)              | 0.53           |
| Boys, n (%)                                                                        | 383 (52.1)               | 972 (53.5)               |                |
| Gestational age                                                                    | (n=735)                  | (n=1817)                 |                |
| Days, median (25 <sup>th</sup> , 75 <sup>th</sup> percentile)                      | 282 (276;288)            | 281 (273;287)            | <b>0.001</b>   |
| Birth weight                                                                       | (n=734)                  | (n=1818)                 |                |
| Gram, mean $\pm$ SD                                                                | 3567 $\pm$ 473           | 3507 $\pm$ 557           | <b>0.01</b>    |
| Birth length                                                                       | (n=728)                  | (n=1804)                 |                |
| Centimeter, mean $\pm$ SD                                                          | 52.1 $\pm$ 2.1           | 51.8 $\pm$ 2.6           | <b>0.01</b>    |
| Exclusive breastfeeding                                                            | (n=583)                  | (n=1135)                 |                |
| Weeks, median (25 <sup>th</sup> , 75 <sup>th</sup> percentile)                     | 33 (16;48)               | 30 (12;44)               | <b>0.01</b>    |

**Table S3.** Words produced from the MacArthur-Bates Communicative Development Inventories (MB-CDI) at different ages.

| Offspring age<br>(months) | All (n=735) |                               | Girls (n=352) |                               | Boys (n=383) |                               | <i>p</i> -value  |
|---------------------------|-------------|-------------------------------|---------------|-------------------------------|--------------|-------------------------------|------------------|
|                           | n           | Words produced<br>Mean (± SD) | n             | Words produced<br>Mean (± SD) | n            | Words produced<br>Mean (± SD) |                  |
| 12                        | 544         | 4.39 (6.38)                   | 258           | 4.98 (6.62)                   | 286          | 3.85 (6.12)                   | <b>0.04</b>      |
| 15                        | 534         | 14.16 (15.12)                 | 261           | 16.20 (17.06)                 | 272          | 12.20 (12.72)                 | <b>0.002</b>     |
| 18                        | 537         | 46.93 (50.71)                 | 257           | 56.43 (56.29)                 | 279          | 38.21 (43.29)                 | <b>&lt;0.001</b> |
| 21                        | 394         | 152.09 (141.24)               | 194           | 181.23 (147.83)               | 200          | 123.83 (128.73)               | <b>&lt;0.001</b> |
| 24                        | 460         | 269.36 (174.35)               | 220           | 312.97 (179.35)               | 240          | 229.39 (159.85)               | <b>&lt;0.001</b> |
| 27                        | 385         | 379.24 (193.30)               | 182           | 403.26 (179.49)               | 203          | 357.70 (202.92)               | <b>0.02</b>      |
| 30                        | 337         | 451.58 (172.13)               | 149           | 485.32 (153.56)               | 188          | 424.85 (181.24)               | <b>&lt;0.001</b> |
| 33                        | 277         | 521.98 (168.11)               | 131           | 546.56 (161.69)               | 146          | 499.92 (171.22)               | <b>0.02</b>      |
| 36                        | 92          | 577.52 (116.35)               | 51            | 589.82 (102.15)               | 41           | 562.22 (131.60)               | 0.27             |

*P*-value represents the difference between girls and boys.

**Table S4.** The average predicted probability of producing words within the MB-CDI according to maternal thyroid peroxidase antibody (TPOAb) status by offspring age (Model 1). The effect of the predictor is considered significant when the predicted probability point estimate for one group is not included within the 95% confidence interval range of the other group. Abbreviations: CI, confidence interval; SE, standard error.

| TPOAb<br>(<11.0 vs. ≥11.0 kIU/L) | Offspring<br>age | Girls                 |       |          |          | Boys                  |       |          |          |
|----------------------------------|------------------|-----------------------|-------|----------|----------|-----------------------|-------|----------|----------|
|                                  |                  | Predicted probability | SE    | Lower CI | Upper CI | Predicted probability | SE    | Lower CI | Upper CI |
| <11.0                            | 12               | 0.008                 | 0.150 | 0.006    | 0.010    | 0.003                 | 0.159 | 0.002    | 0.004    |
| <11.0                            | 15               | 0.021                 | 0.150 | 0.016    | 0.028    | 0.009                 | 0.159 | 0.006    | 0.012    |
| <11.0                            | 18               | 0.057                 | 0.150 | 0.043    | 0.075    | 0.024                 | 0.159 | 0.017    | 0.032    |
| <11.0                            | 21               | 0.147                 | 0.150 | 0.114    | 0.187    | 0.064                 | 0.159 | 0.048    | 0.085    |
| <11.0                            | 24               | 0.327                 | 0.150 | 0.266    | 0.394    | 0.161                 | 0.159 | 0.123    | 0.207    |
| <11.0                            | 27               | 0.579                 | 0.150 | 0.506    | 0.648    | 0.350                 | 0.159 | 0.283    | 0.423    |
| <11.0                            | 30               | 0.795                 | 0.150 | 0.743    | 0.839    | 0.602                 | 0.159 | 0.525    | 0.673    |
| <11.0                            | 33               | 0.916                 | 0.150 | 0.891    | 0.936    | 0.809                 | 0.159 | 0.756    | 0.853    |
| <11.0                            | 36               | 0.969                 | 0.150 | 0.959    | 0.977    | 0.922                 | 0.159 | 0.879    | 0.942    |
| ≥11.0                            | 12               | 0.005                 | 0.265 | 0.003    | 0.009    | 0.003                 | 0.287 | 0.002    | 0.005    |
| ≥11.0                            | 15               | 0.013                 | 0.264 | 0.008    | 0.022    | 0.007                 | 0.287 | 0.004    | 0.013    |
| ≥11.0                            | 18               | 0.034                 | 0.264 | 0.021    | 0.056    | 0.019                 | 0.286 | 0.011    | 0.033    |
| ≥11.0                            | 21               | 0.084                 | 0.263 | 0.052    | 0.133    | 0.048                 | 0.286 | 0.028    | 0.081    |
| ≥11.0                            | 24               | 0.192                 | 0.263 | 0.124    | 0.285    | 0.117                 | 0.286 | 0.070    | 0.188    |
| ≥11.0                            | 27               | 0.381                 | 0.263 | 0.269    | 0.508    | 0.258                 | 0.286 | 0.165    | 0.378    |
| ≥11.0                            | 30               | 0.615                 | 0.264 | 0.488    | 0.728    | 0.476                 | 0.286 | 0.342    | 0.614    |
| ≥11.0                            | 33               | 0.806                 | 0.264 | 0.712    | 0.874    | 0.704                 | 0.287 | 0.576    | 0.807    |
| ≥11.0                            | 36               | 0.915                 | 0.264 | 0.865    | 0.948    | 0.862                 | 0.287 | 0.780    | 0.916    |

Abbreviations: CI, confidence interval; SE, standard error.

**Table S5.** The difference in the number of words produced at 30 months stratified for sex, when comparing offspring of TPOAb positive and negative mothers, and offspring at maternal FT4 levels <20% and >80% percentiles.

|                   | <b>Girls</b>                       | <b>Boys</b>                        |
|-------------------|------------------------------------|------------------------------------|
|                   | Words produced<br>Mean ( $\pm$ SD) | Words produced<br>Mean ( $\pm$ SD) |
| <b>TPOAb</b>      |                                    |                                    |
| <11.0 kIU/L       | 498 (152.6)                        | 423 (167.3)                        |
| $\geq$ 11.0 kIU/L | 417 (146.3)                        | 409 (273.3)                        |
| <b>FT4</b>        |                                    |                                    |
| <20% percentile   | 486 (145.7)                        | 428 (170.9)                        |
| >80% percentile   | 471 (155.8)                        | 393 (138.0)                        |

**Abbreviations:** FT4, free thyroxine; SD, standard deviation; TPOAb, thyroid peroxidase antibodies.

**Table S6.** Predicted probabilities of producing words within the MB-CDI at the 5<sup>th</sup>, 50<sup>th</sup>, 95<sup>th</sup>, and 99<sup>th</sup> percentile of thyroid peroxidase antibodies (TPOAb) by offspring age (Model 2). The effect of the predictor is considered significant when the predicted probability point estimate for one group is not included within the 95% confidence interval (CI) range of the other group. Abbreviations: SE, standard error.

| TPOAb (kIU/L)               | Offspring age | Girls                 |       |          |          | Boys                  |       |          |          |
|-----------------------------|---------------|-----------------------|-------|----------|----------|-----------------------|-------|----------|----------|
|                             |               | Predicted probability | SE    | Lower CI | Upper CI | Predicted probability | SE    | Lower CI | Upper CI |
| 5 <sup>th</sup> percentile  | 12            | 0.008                 | 0.149 | 0.006    | 0.010    | 0.003                 | 0.158 | 0.002    | 0.004    |
| 5 <sup>th</sup> percentile  | 15            | 0.021                 | 0.148 | 0.016    | 0.028    | 0.008                 | 0.158 | 0.006    | 0.011    |
| 5 <sup>th</sup> percentile  | 18            | 0.056                 | 0.148 | 0.043    | 0.074    | 0.023                 | 0.158 | 0.017    | 0.031    |
| 5 <sup>th</sup> percentile  | 21            | 0.143                 | 0.148 | 0.111    | 0.182    | 0.062                 | 0.158 | 0.046    | 0.083    |
| 5 <sup>th</sup> percentile  | 24            | 0.317                 | 0.148 | 0.258    | 0.383    | 0.157                 | 0.158 | 0.120    | 0.202    |
| 5 <sup>th</sup> percentile  | 27            | 0.564                 | 0.148 | 0.492    | 0.634    | 0.342                 | 0.158 | 0.276    | 0.415    |
| 5 <sup>th</sup> percentile  | 30            | 0.783                 | 0.148 | 0.730    | 0.829    | 0.593                 | 0.158 | 0.516    | 0.665    |
| 5 <sup>th</sup> percentile  | 33            | 0.910                 | 0.148 | 0.883    | 0.931    | 0.803                 | 0.158 | 0.749    | 0.847    |
| 5 <sup>th</sup> percentile  | 36            | 0.966                 | 0.149 | 0.955    | 0.974    | 0.919                 | 0.158 | 0.893    | 0.939    |
| 50 <sup>th</sup> percentile | 12            | 0.007                 | 0.149 | 0.005    | 0.010    | 0.003                 | 0.158 | 0.002    | 0.004    |
| 50 <sup>th</sup> percentile | 15            | 0.020                 | 0.149 | 0.015    | 0.027    | 0.008                 | 0.158 | 0.006    | 0.011    |
| 50 <sup>th</sup> percentile | 18            | 0.054                 | 0.149 | 0.041    | 0.071    | 0.023                 | 0.158 | 0.017    | 0.031    |
| 50 <sup>th</sup> percentile | 21            | 0.137                 | 0.149 | 0.106    | 0.175    | 0.062                 | 0.158 | 0.046    | 0.082    |
| 50 <sup>th</sup> percentile | 24            | 0.307                 | 0.149 | 0.249    | 0.372    | 0.154                 | 0.158 | 0.118    | 0.199    |
| 50 <sup>th</sup> percentile | 27            | 0.553                 | 0.149 | 0.480    | 0.624    | 0.336                 | 0.158 | 0.271    | 0.408    |
| 50 <sup>th</sup> percentile | 30            | 0.776                 | 0.149 | 0.721    | 0.822    | 0.584                 | 0.158 | 0.507    | 0.657    |
| 50 <sup>th</sup> percentile | 33            | 0.906                 | 0.149 | 0.878    | 0.928    | 0.796                 | 0.158 | 0.741    | 0.842    |
| 50 <sup>th</sup> percentile | 36            | 0.964                 | 0.149 | 0.953    | 0.973    | 0.915                 | 0.158 | 0.888    | 0.937    |
| 95 <sup>th</sup> percentile | 12            | 0.006                 | 0.179 | 0.004    | 0.009    | 0.003                 | 0.187 | 0.002    | 0.005    |
| 95 <sup>th</sup> percentile | 15            | 0.017                 | 0.178 | 0.012    | 0.024    | 0.008                 | 0.186 | 0.006    | 0.012    |
| 95 <sup>th</sup> percentile | 18            | 0.046                 | 0.178 | 0.033    | 0.063    | 0.023                 | 0.186 | 0.016    | 0.032    |
| 95 <sup>th</sup> percentile | 21            | 0.118                 | 0.178 | 0.086    | 0.159    | 0.059                 | 0.186 | 0.042    | 0.082    |
| 95 <sup>th</sup> percentile | 24            | 0.272                 | 0.178 | 0.209    | 0.346    | 0.144                 | 0.186 | 0.105    | 0.195    |
| 95 <sup>th</sup> percentile | 27            | 0.511                 | 0.178 | 0.424    | 0.597    | 0.313                 | 0.186 | 0.240    | 0.396    |
| 95 <sup>th</sup> percentile | 30            | 0.745                 | 0.178 | 0.673    | 0.805    | 0.551                 | 0.186 | 0.460    | 0.639    |
| 95 <sup>th</sup> percentile | 33            | 0.891                 | 0.178 | 0.852    | 0.920    | 0.769                 | 0.187 | 0.697    | 0.827    |
| 95 <sup>th</sup> percentile | 36            | 0.958                 | 0.178 | 0.941    | 0.970    | 0.900                 | 0.187 | 0.861    | 0.928    |
| 99 <sup>th</sup> percentile | 12            | 0.003                 | 0.399 | 0.002    | 0.008    | 0.004                 | 0.413 | 0.002    | 0.008    |
| 99 <sup>th</sup> percentile | 15            | 0.010                 | 0.398 | 0.004    | 0.021    | 0.009                 | 0.412 | 0.004    | 0.019    |
| 99 <sup>th</sup> percentile | 18            | 0.027                 | 0.397 | 0.012    | 0.056    | 0.021                 | 0.411 | 0.010    | 0.046    |
| 99 <sup>th</sup> percentile | 21            | 0.072                 | 0.397 | 0.034    | 0.144    | 0.051                 | 0.411 | 0.023    | 0.107    |
| 99 <sup>th</sup> percentile | 24            | 0.178                 | 0.397 | 0.091    | 0.320    | 0.117                 | 0.412 | 0.056    | 0.228    |
| 99 <sup>th</sup> percentile | 27            | 0.378                 | 0.397 | 0.219    | 0.570    | 0.246                 | 0.412 | 0.127    | 0.423    |
| 99 <sup>th</sup> percentile | 30            | 0.631                 | 0.397 | 0.440    | 0.788    | 0.446                 | 0.413 | 0.264    | 0.645    |
| 99 <sup>th</sup> percentile | 33            | 0.828                 | 0.397 | 0.688    | 0.913    | 0.666                 | 0.415 | 0.469    | 0.818    |
| 99 <sup>th</sup> percentile | 36            | 0.931                 | 0.398 | 0.861    | 0.967    | 0.831                 | 0.417 | 0.685    | 0.918    |



**Table S7.** Predicted probabilities of producing words within the MB-CDI according to maternal free thyroxine (FT4) levels in early pregnancy by offspring age (Model 3). The effect of the predictor is considered significant when the predicted probability point estimate for one group is not included within the 95% CI range of the other group. Abbreviations: CI, confidence interval; SE, standard error.

| FT4<br>(<20% vs. >80%) | Offspring<br>age | Girls                    |       |          |          | Boys                  |       |          |          |
|------------------------|------------------|--------------------------|-------|----------|----------|-----------------------|-------|----------|----------|
|                        |                  | Predicted<br>probability | SE    | Lower CI | Upper CI | Predicted probability | SE    | Lower CI | Upper CI |
| <20%                   | 12               | 0.005                    | 0.300 | 0.003    | 0.008    | 0.003                 | 0.262 | 0.002    | 0.005    |
| <20%                   | 15               | 0.013                    | 0.299 | 0.007    | 0.023    | 0.008                 | 0.262 | 0.005    | 0.014    |
| <20%                   | 18               | 0.036                    | 0.299 | 0.021    | 0.064    | 0.024                 | 0.261 | 0.014    | 0.039    |
| <20%                   | 21               | 0.098                    | 0.299 | 0.057    | 0.164    | 0.066                 | 0.261 | 0.041    | 0.105    |
| <20%                   | 24               | 0.239                    | 0.299 | 0.149    | 0.361    | 0.171                 | 0.261 | 0.110    | 0.256    |
| <20%                   | 27               | 0.476                    | 0.299 | 0.336    | 0.620    | 0.376                 | 0.261 | 0.266    | 0.502    |
| <20%                   | 30               | 0.724                    | 0.299 | 0.593    | 0.825    | 0.638                 | 0.261 | 0.514    | 0.747    |
| <20%                   | 33               | 0.883                    | 0.300 | 0.808    | 0.932    | 0.838                 | 0.261 | 0.756    | 0.896    |
| <20%                   | 36               | 0.956                    | 0.300 | 0.924    | 0.975    | 0.938                 | 0.262 | 0.900    | 0.962    |
| >80%                   | 12               | 0.006                    | 0.261 | 0.003    | 0.009    | 0.002                 | 0.289 | 0.001    | 0.004    |
| >80%                   | 15               | 0.015                    | 0.260 | 0.009    | 0.025    | 0.007                 | 0.288 | 0.004    | 0.012    |
| >80%                   | 18               | 0.040                    | 0.260 | 0.024    | 0.065    | 0.019                 | 0.288 | 0.011    | 0.033    |
| >80%                   | 21               | 0.102                    | 0.260 | 0.064    | 0.158    | 0.052                 | 0.288 | 0.030    | 0.088    |
| >80%                   | 24               | 0.235                    | 0.260 | 0.156    | 0.338    | 0.136                 | 0.288 | 0.082    | 0.216    |
| >80%                   | 27               | 0.455                    | 0.260 | 0.334    | 0.581    | 0.309                 | 0.288 | 0.203    | 0.440    |
| >80%                   | 30               | 0.693                    | 0.260 | 0.576    | 0.790    | 0.560                 | 0.288 | 0.420    | 0.691    |
| >80%                   | 33               | 0.860                    | 0.260 | 0.787    | 0.911    | 0.784                 | 0.288 | 0.674    | 0.864    |
| >80%                   | 36               | 0.943                    | 0.261 | 0.909    | 0.965    | 0.912                 | 0.288 | 0.854    | 0.948    |

**Table S8.** Predicted probabilities of productive vocabulary scores at the 5<sup>th</sup>, 50<sup>th</sup>, and 95<sup>th</sup> percentile of maternal free thyroxine (FT4) in early pregnancy by offspring age (Model 4). The effect of the predictor is considered significant when the predicted probability point estimate for one group is not included within the 95% CI range of the other group. Abbreviations: CI, confidence interval; SE, standard error.

| FT4 (pmol/L)                | Offspring age | Girls                 |       |          |          | Boys                  |       |          |          |
|-----------------------------|---------------|-----------------------|-------|----------|----------|-----------------------|-------|----------|----------|
|                             |               | Predicted probability | SE    | Lower CI | Upper CI | Predicted probability | SE    | Lower CI | Upper CI |
| 5 <sup>th</sup> percentile  | 12            | 0.008                 | 0.203 | 0.005    | 0.011    | 0.003                 | 0.201 | 0.002    | 0.005    |
| 5 <sup>th</sup> percentile  | 15            | 0.021                 | 0.202 | 0.015    | 0.032    | 0.009                 | 0.201 | 0.006    | 0.014    |
| 5 <sup>th</sup> percentile  | 18            | 0.060                 | 0.202 | 0.041    | 0.087    | 0.026                 | 0.200 | 0.017    | 0.037    |
| 5 <sup>th</sup> percentile  | 21            | 0.156                 | 0.202 | 0.111    | 0.216    | 0.068                 | 0.200 | 0.047    | 0.097    |
| 5 <sup>th</sup> percentile  | 24            | 0.350                 | 0.202 | 0.266    | 0.445    | 0.166                 | 0.200 | 0.119    | 0.228    |
| 5 <sup>th</sup> percentile  | 27            | 0.610                 | 0.202 | 0.513    | 0.699    | 0.355                 | 0.200 | 0.271    | 0.449    |
| 5 <sup>th</sup> percentile  | 30            | 0.820                 | 0.202 | 0.754    | 0.871    | 0.603                 | 0.200 | 0.506    | 0.692    |
| 5 <sup>th</sup> percentile  | 33            | 0.930                 | 0.203 | 0.899    | 0.952    | 0.807                 | 0.200 | 0.739    | 0.861    |
| 5 <sup>th</sup> percentile  | 36            | 0.975                 | 0.203 | 0.963    | 0.983    | 0.920                 | 0.201 | 0.886    | 0.945    |
| 50 <sup>th</sup> percentile | 12            | 0.008                 | 0.150 | 0.006    | 0.010    | 0.003                 | 0.159 | 0.002    | 0.004    |
| 50 <sup>th</sup> percentile | 15            | 0.021                 | 0.150 | 0.016    | 0.028    | 0.009                 | 0.159 | 0.006    | 0.012    |
| 50 <sup>th</sup> percentile | 18            | 0.058                 | 0.150 | 0.044    | 0.076    | 0.023                 | 0.159 | 0.017    | 0.032    |
| 50 <sup>th</sup> percentile | 21            | 0.147                 | 0.150 | 0.114    | 0.187    | 0.063                 | 0.159 | 0.047    | 0.083    |
| 50 <sup>th</sup> percentile | 24            | 0.325                 | 0.150 | 0.264    | 0.393    | 0.157                 | 0.158 | 0.120    | 0.202    |
| 50 <sup>th</sup> percentile | 27            | 0.575                 | 0.150 | 0.502    | 0.645    | 0.340                 | 0.158 | 0.274    | 0.413    |
| 50 <sup>th</sup> percentile | 30            | 0.792                 | 0.150 | 0.739    | 0.836    | 0.589                 | 0.159 | 0.512    | 0.662    |
| 50 <sup>th</sup> percentile | 33            | 0.914                 | 0.150 | 0.888    | 0.935    | 0.799                 | 0.159 | 0.745    | 0.845    |
| 50 <sup>th</sup> percentile | 36            | 0.968                 | 0.150 | 0.957    | 0.976    | 0.917                 | 0.159 | 0.890    | 0.938    |
| 95 <sup>th</sup> percentile | 12            | 0.008                 | 0.221 | 0.005    | 0.012    | 0.003                 | 0.235 | 0.002    | 0.004    |
| 95 <sup>th</sup> percentile | 15            | 0.021                 | 0.221 | 0.014    | 0.032    | 0.007                 | 0.234 | 0.005    | 0.011    |
| 95 <sup>th</sup> percentile | 18            | 0.054                 | 0.221 | 0.036    | 0.081    | 0.020                 | 0.234 | 0.013    | 0.031    |
| 95 <sup>th</sup> percentile | 21            | 0.133                 | 0.221 | 0.090    | 0.191    | 0.055                 | 0.234 | 0.035    | 0.084    |
| 95 <sup>th</sup> percentile | 24            | 0.290                 | 0.221 | 0.209    | 0.386    | 0.140                 | 0.234 | 0.093    | 0.205    |
| 95 <sup>th</sup> percentile | 27            | 0.521                 | 0.221 | 0.414    | 0.626    | 0.315                 | 0.234 | 0.225    | 0.421    |
| 95 <sup>th</sup> percentile | 30            | 0.743                 | 0.221 | 0.653    | 0.817    | 0.564                 | 0.234 | 0.450    | 0.672    |
| 95 <sup>th</sup> percentile | 33            | 0.885                 | 0.221 | 0.833    | 0.922    | 0.785                 | 0.234 | 0.697    | 0.852    |
| 95 <sup>th</sup> percentile | 36            | 0.954                 | 0.221 | 0.930    | 0.969    | 0.911                 | 0.234 | 0.867    | 0.942    |

**Table S9.** The predicted probabilities of productive vocabulary scores according to early pregnancy maternal plasma thyrotropin (TSH)  $\leq 2.5$  and  $> 2.5$  mIU/L, respectively, by offspring age (Model 5). The effect of the predictor is considered significant when the predicted probability point estimate for one group is not included within the 95% confidence interval (CI) range of the other group. Abbreviations: SE, standard error.

| TSH<br>( $\leq 2.5$ vs. $> 2.5$ ) | Offspring<br>age | Girls                 |       |          |          | Boys                  |       |          |          |
|-----------------------------------|------------------|-----------------------|-------|----------|----------|-----------------------|-------|----------|----------|
|                                   |                  | Predicted probability | SE    | Lower CI | Upper CI | Predicted probability | SE    | Lower CI | Upper CI |
| $\leq 2.5$                        | 12               | 0.007                 | 0.155 | 0.005    | 0.010    | 0.003                 | 0.167 | 0.002    | 0.005    |
| $\leq 2.5$                        | 15               | 0.020                 | 0.155 | 0.015    | 0.027    | 0.009                 | 0.167 | 0.007    | 0.013    |
| $\leq 2.5$                        | 18               | 0.055                 | 0.155 | 0.041    | 0.073    | 0.025                 | 0.167 | 0.018    | 0.034    |
| $\leq 2.5$                        | 21               | 0.139                 | 0.155 | 0.107    | 0.179    | 0.065                 | 0.167 | 0.047    | 0.087    |
| $\leq 2.5$                        | 24               | 0.310                 | 0.155 | 0.249    | 0.378    | 0.160                 | 0.167 | 0.120    | 0.208    |
| $\leq 2.5$                        | 27               | 0.556                 | 0.155 | 0.480    | 0.629    | 0.343                 | 0.167 | 0.273    | 0.420    |
| $\leq 2.5$                        | 30               | 0.777                 | 0.155 | 0.720    | 0.825    | 0.589                 | 0.167 | 0.508    | 0.665    |
| $\leq 2.5$                        | 33               | 0.907                 | 0.155 | 0.878    | 0.929    | 0.798                 | 0.167 | 0.740    | 0.845    |
| $\leq 2.5$                        | 36               | 0.964                 | 0.155 | 0.952    | 0.973    | 0.916                 | 0.167 | 0.887    | 0.938    |
| $> 2.5$                           | 12               | 0.008                 | 0.255 | 0.005    | 0.013    | 0.002                 | 0.245 | 0.001    | 0.003    |
| $> 2.5$                           | 15               | 0.023                 | 0.255 | 0.014    | 0.037    | 0.006                 | 0.244 | 0.004    | 0.010    |
| $> 2.5$                           | 18               | 0.062                 | 0.254 | 0.039    | 0.098    | 0.018                 | 0.244 | 0.011    | 0.029    |
| $> 2.5$                           | 21               | 0.159                 | 0.254 | 0.103    | 0.237    | 0.053                 | 0.243 | 0.033    | 0.082    |
| $> 2.5$                           | 24               | 0.350                 | 0.254 | 0.247    | 0.470    | 0.143                 | 0.243 | 0.094    | 0.212    |
| $> 2.5$                           | 27               | 0.606                 | 0.254 | 0.483    | 0.717    | 0.334                 | 0.243 | 0.237    | 0.447    |
| $> 2.5$                           | 30               | 0.814                 | 0.254 | 0.727    | 0.878    | 0.601                 | 0.244 | 0.483    | 0.708    |
| $> 2.5$                           | 33               | 0.926                 | 0.255 | 0.883    | 0.954    | 0.819                 | 0.244 | 0.737    | 0.879    |
| $> 2.5$                           | 36               | 0.973                 | 0.256 | 0.956    | 0.983    | 0.931                 | 0.244 | 0.893    | 0.956    |

**Table S10.** Predicted probabilities of productive vocabulary scores at the 5<sup>th</sup>, 50<sup>th</sup>, and 95<sup>th</sup> percentile of early pregnancy maternal plasma thyrotropin (TSH), by offspring age (Model 6). The effect of the predictor is considered significant when the predicted probability point estimate for one group is not included within the 95% confidence interval (CI) range of the other group. Abbreviations: SE, standard error.

| TSH                         | Offspring age | Girls                 |       |          |          | Boys                  |       |          |          |
|-----------------------------|---------------|-----------------------|-------|----------|----------|-----------------------|-------|----------|----------|
|                             |               | Predicted probability | SE    | Lower CI | Upper CI | Predicted probability | SE    | Lower CI | Upper CI |
| 5 <sup>th</sup> percentile  | 12            | 0.008                 | 0.247 | 0.005    | 0.013    | 0.004                 | 0.258 | 0.003    | 0.007    |
| 5 <sup>th</sup> percentile  | 15            | 0.022                 | 0.247 | 0.013    | 0.035    | 0.012                 | 0.258 | 0.007    | 0.019    |
| 5 <sup>th</sup> percentile  | 18            | 0.057                 | 0.246 | 0.036    | 0.089    | 0.031                 | 0.257 | 0.019    | 0.05     |
| 5 <sup>th</sup> percentile  | 21            | 0.141                 | 0.246 | 0.092    | 0.209    | 0.077                 | 0.257 | 0.048    | 0.121    |
| 5 <sup>th</sup> percentile  | 24            | 0.308                 | 0.246 | 0.215    | 0.419    | 0.181                 | 0.257 | 0.118    | 0.268    |
| 5 <sup>th</sup> percentile  | 27            | 0.548                 | 0.246 | 0.428    | 0.662    | 0.370                 | 0.257 | 0.261    | 0.493    |
| 5 <sup>th</sup> percentile  | 30            | 0.767                 | 0.246 | 0.670    | 0.842    | 0.608                 | 0.257 | 0.484    | 0.720    |
| 5 <sup>th</sup> percentile  | 33            | 0.900                 | 0.247 | 0.847    | 0.936    | 0.805                 | 0.258 | 0.713    | 0.872    |
| 5 <sup>th</sup> percentile  | 36            | 0.961                 | 0.247 | 0.938    | 0.975    | 0.916                 | 0.258 | 0.868    | 0.948    |
| 50 <sup>th</sup> percentile | 12            | 0.008                 | 0.221 | 0.005    | 0.012    | 0.003                 | 0.22  | 0.002    | 0.005    |
| 50 <sup>th</sup> percentile | 15            | 0.021                 | 0.221 | 0.014    | 0.032    | 0.009                 | 0.22  | 0.006    | 0.014    |
| 50 <sup>th</sup> percentile | 18            | 0.056                 | 0.221 | 0.037    | 0.084    | 0.024                 | 0.22  | 0.016    | 0.037    |
| 50 <sup>th</sup> percentile | 21            | 0.142                 | 0.221 | 0.097    | 0.203    | 0.065                 | 0.22  | 0.043    | 0.096    |
| 50 <sup>th</sup> percentile | 24            | 0.314                 | 0.221 | 0.229    | 0.414    | 0.160                 | 0.22  | 0.111    | 0.227    |
| 50 <sup>th</sup> percentile | 27            | 0.561                 | 0.221 | 0.453    | 0.663    | 0.346                 | 0.22  | 0.256    | 0.449    |
| 50 <sup>th</sup> percentile | 30            | 0.780                 | 0.221 | 0.697    | 0.845    | 0.594                 | 0.22  | 0.488    | 0.693    |
| 50 <sup>th</sup> percentile | 33            | 0.908                 | 0.221 | 0.865    | 0.938    | 0.802                 | 0.22  | 0.725    | 0.862    |
| 50 <sup>th</sup> percentile | 36            | 0.965                 | 0.221 | 0.947    | 0.977    | 0.918                 | 0.22  | 0.880    | 0.945    |
| 95 <sup>th</sup> percentile | 12            | 0.007                 | 0.269 | 0.004    | 0.011    | 0.002                 | 0.263 | 0.001    | 0.003    |
| 95 <sup>th</sup> percentile | 15            | 0.019                 | 0.269 | 0.012    | 0.032    | 0.006                 | 0.263 | 0.003    | 0.009    |
| 95 <sup>th</sup> percentile | 18            | 0.054                 | 0.269 | 0.033    | 0.089    | 0.017                 | 0.263 | 0.010    | 0.027    |
| 95 <sup>th</sup> percentile | 21            | 0.144                 | 0.269 | 0.090    | 0.221    | 0.048                 | 0.262 | 0.029    | 0.078    |
| 95 <sup>th</sup> percentile | 24            | 0.328                 | 0.268 | 0.224    | 0.452    | 0.130                 | 0.262 | 0.082    | 0.200    |
| 95 <sup>th</sup> percentile | 27            | 0.587                 | 0.269 | 0.456    | 0.706    | 0.309                 | 0.262 | 0.211    | 0.427    |
| 95 <sup>th</sup> percentile | 30            | 0.805                 | 0.269 | 0.709    | 0.875    | 0.571                 | 0.262 | 0.443    | 0.690    |
| 95 <sup>th</sup> percentile | 33            | 0.923                 | 0.269 | 0.877    | 0.953    | 0.799                 | 0.263 | 0.703    | 0.869    |
| 95 <sup>th</sup> percentile | 36            | 0.972                 | 0.269 | 0.954    | 0.983    | 0.922                 | 0.263 | 0.876    | 0.952    |

|                             |    |       |       |       |       |       |       |       |       |
|-----------------------------|----|-------|-------|-------|-------|-------|-------|-------|-------|
| 99 <sup>th</sup> percentile | 12 | 0.006 | 0.341 | 0.003 | 0.012 | 0.001 | 0.380 | 0.001 | 0.002 |
| 99 <sup>th</sup> percentile | 15 | 0.019 | 0.341 | 0.010 | 0.036 | 0.004 | 0.379 | 0.002 | 0.008 |
| 99 <sup>th</sup> percentile | 18 | 0.054 | 0.340 | 0.028 | 0.099 | 0.012 | 0.378 | 0.006 | 0.024 |
| 99 <sup>th</sup> percentile | 21 | 0.145 | 0.340 | 0.080 | 0.248 | 0.036 | 0.378 | 0.018 | 0.073 |
| 99 <sup>th</sup> percentile | 24 | 0.336 | 0.340 | 0.206 | 0.496 | 0.107 | 0.378 | 0.054 | 0.201 |
| 99 <sup>th</sup> percentile | 27 | 0.602 | 0.340 | 0.437 | 0.746 | 0.277 | 0.378 | 0.154 | 0.445 |
| 99 <sup>th</sup> percentile | 30 | 0.819 | 0.340 | 0.699 | 0.898 | 0.549 | 0.378 | 0.367 | 0.719 |
| 99 <sup>th</sup> percentile | 33 | 0.931 | 0.341 | 0.874 | 0.963 | 0.795 | 0.378 | 0.649 | 0.891 |
| 99 <sup>th</sup> percentile | 36 | 0.976 | 0.342 | 0.954 | 0.987 | 0.925 | 0.379 | 0.855 | 0.963 |
